# Supplementary material for: Imagination Materializes with Serendipity: Third Polymorph of N-Amino 1,8-Naphthalimide
Source: Research Square preprint supplement (doi:10.21203/rs.3.rs-7535669/v1), 2025-09-10
Supplement: Supplementary file 1 [file a6fa6d489547824f6d52f6b8.docx]

**Supporting Information**

Imagination Materializes with Serendipity: Third Polymorph of N-Amino 1,8-Naphthalimide

Satyendra Verma, Jubaraj B. Baruah*

Content list:

| Table S1 | The crystal and refinement parameters of the Polymoroh-3 and DTU |
| --- | --- |
| Figure 1S | 1H-NMR of DTU. (DMSO-d6, 600 MHz) |
| Figure 2S | High-resolution mass spectra of DTU |
| Figure 3S | Thermogram (blue) and differential thermogram of DTU (heating rate 10 °C/min, under nitrogen). |
| Figure 4S | 1HNMR (CDCl3, 400 MHz) of N-amino 1,8-naphthalimide. |
| Figure 5S | Experimental PXRD pattern of (a) concomitant polymorphs and the *one* generated from the CIF file of the (b) Polymorph-3 and (c) Polymorph-2. |
| Figure 6S | IR (neat, cm-1) of the concomitant polymorphs. |
| Figure 7S | Thermogram of the concomitant Polymorph-2 and Polymorph-3 (Heating rate 10 °C/minute under nitrogen). |
| Figure 8S | POM image obtained for the Heating at 225 °C, 270 °C and 281 °C of the concomitant polymorph.  Figure 9S:  Fluorescence microscopic images of the concomitant polymorphs (10 μM); a, b, c, and d are under visible-light, green light, UV light, and red light, respectively. (at room temperature) |
| Table S2 | Percentages (%) of interactions of all within the surface (Allin) with different atoms |

Table S1: The crystal and refinement parameters of the Polymoroh-3 and DTU

|  | *Polymorph-3* | | *DTU* |
| --- | --- | --- | --- |
| CCDC | 2423507 | 2484027 | |
| Formula | C12H8N2O2 | C19H11Cl2N3O2S | |
| Mol. wt. | 212.210 | 416.27 | |
| Space group | Pna21 | P21/n | |
| A (Å) | 7.2036(18) | 10.6109(4) | |
| *B (Å)* | 16.373(4) | 8.5478(3) | |
| C (Å) | 7.9960(19) | 19.5788(8) | |
| α (°) | 90 | 90 | |
| β (°) | 90 | 99.6690(10) | |
| γ (°) | 90 | 90 | |
| V (Å3) | 943.1(4) | 1750.57(12) | |
| Density, gcm−3 | 1.495 | 1.579 | |
| Abs. coeff., mm−1 | 0.105 | 0.511 | |
| F(000) | 440.3 | 848.0 | |
| Total no. of reflections | 20727 | 38020 | |
| Reflections, I > 2σ(I) | 1666 | 3058 | |
| Max. θ/° | 25.38 | 25.00 | |
| Ranges (*h*, *k*, *l*) | -8 ≤ h ≤ 8,  -19 ≤ k ≤ 19,  -9 ≤ l ≤ 9 | -12 ≤ h ≤ 12,  -10 ≤ k ≤ 10,  -23 ≤ l ≤ 23 | |
| Complete to 2θ (%) | 99.8 | 99.1 | |
| Data/restraints/parameters | 1666/1/146 | 3058/0/244 | |
| GooF (F2) | 1.136 | 1.062 | |
| R indices [I > 2σ(I)] | 0.0443 | 0.0349 | |
| wR2 [I > 2σ(I)] | 0.0933 | 0.0844 | |
| R indices (all data) | 0.0636 | 0.0384 | |
| wR2 (all data) | 0.1073 | 0.0897 | |


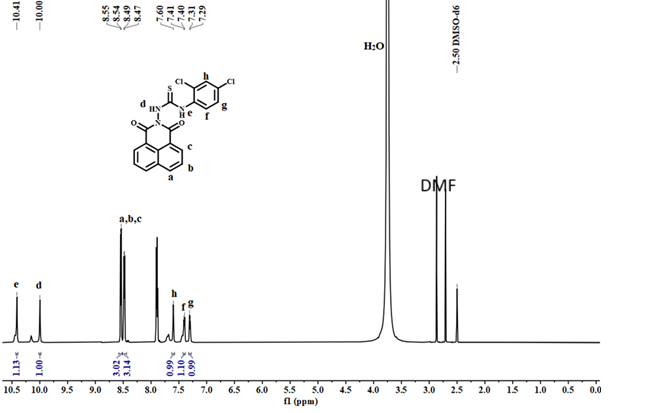


Figure 1S: 1H-NMR of DTU. (DMSO-d6, 600 MHz)


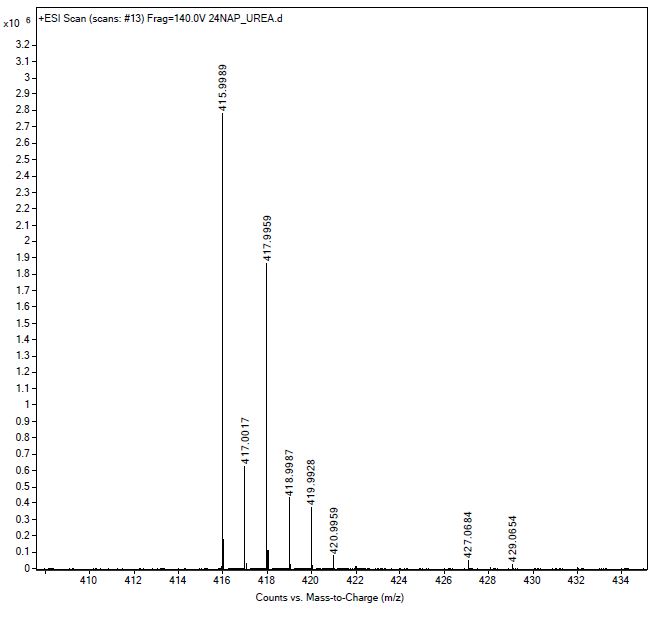


Figure 2S: High-resolution mass spectra of DTU

**
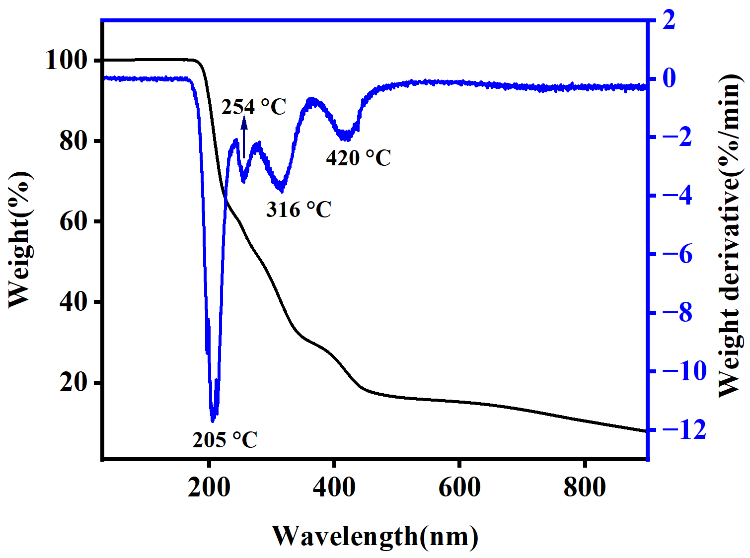
**

Figure 3S:Thermogram (blue) and differential thermogram of DTU (heating rate 10 °C/min, under nitrogen).


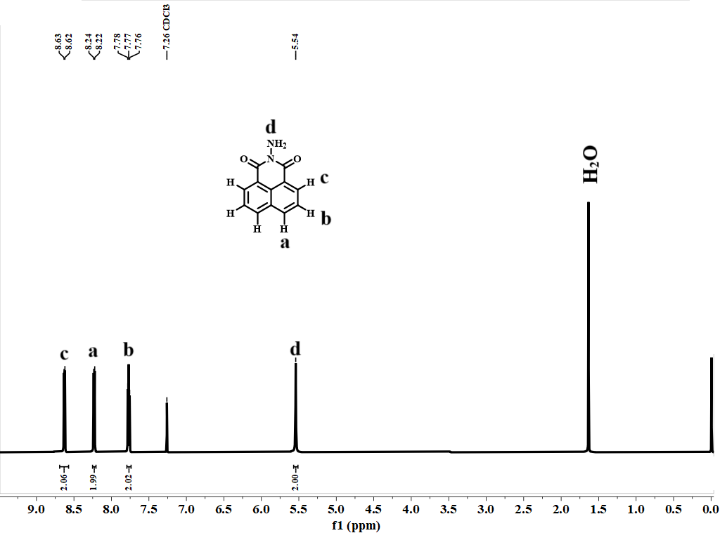


Figure 4S: 1HNMR (CDCl3, 400 MHz) of N-amino 1,8-naphthalimide.


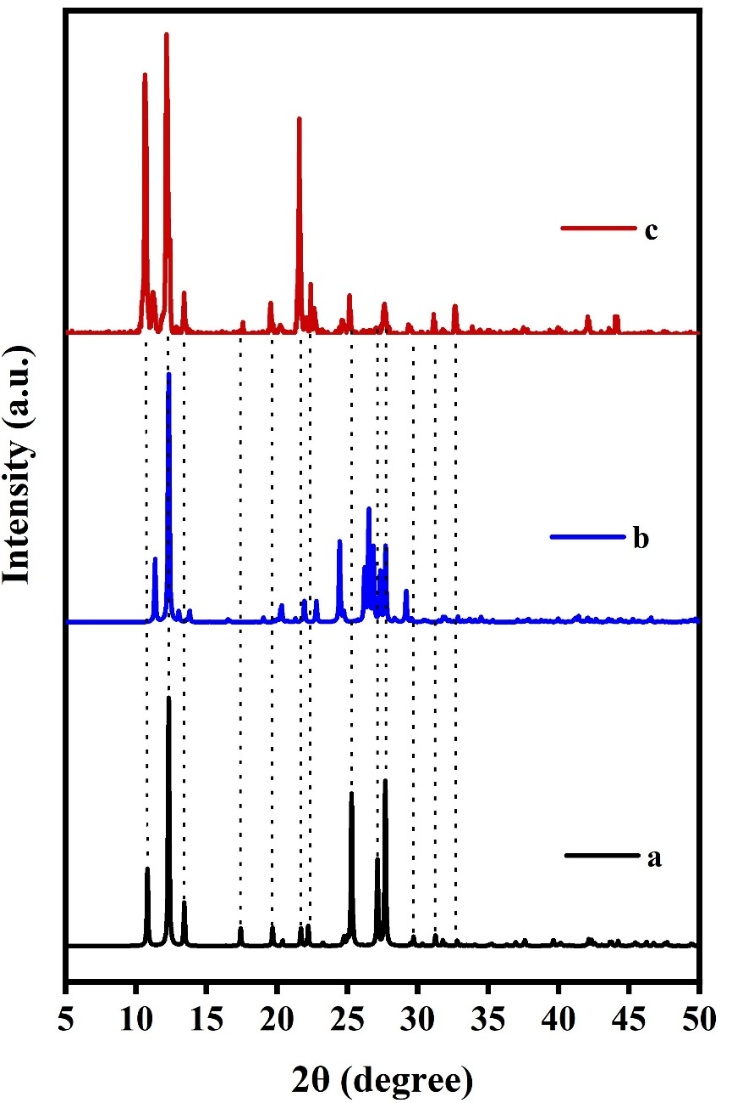


Figure 5S: Experimental PXRD pattern of (a) concomitant polymorphs and the *one* generated from the CIF file of the (b) Polymorph-3 and (c) Polymorph-2.


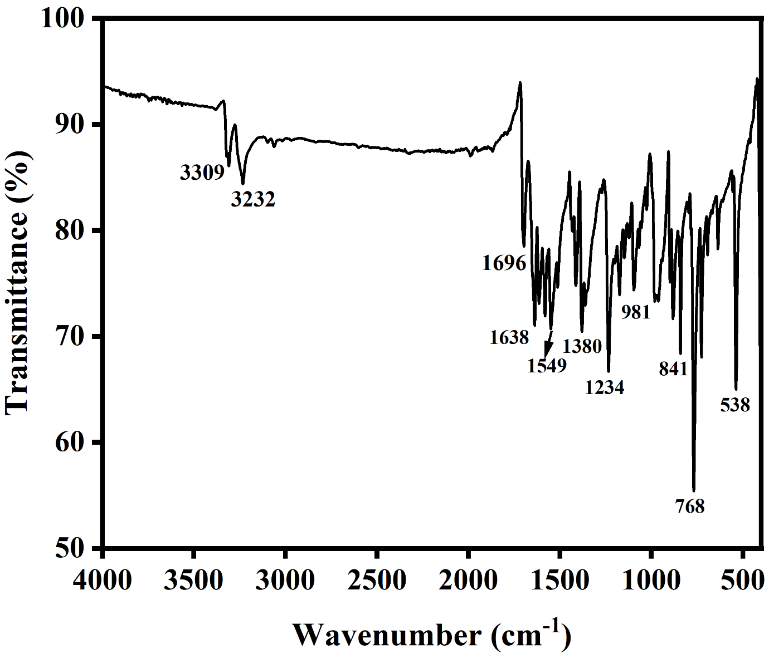


Figure 6S: IR (neat, cm-1) of the concomitant polymorphs.


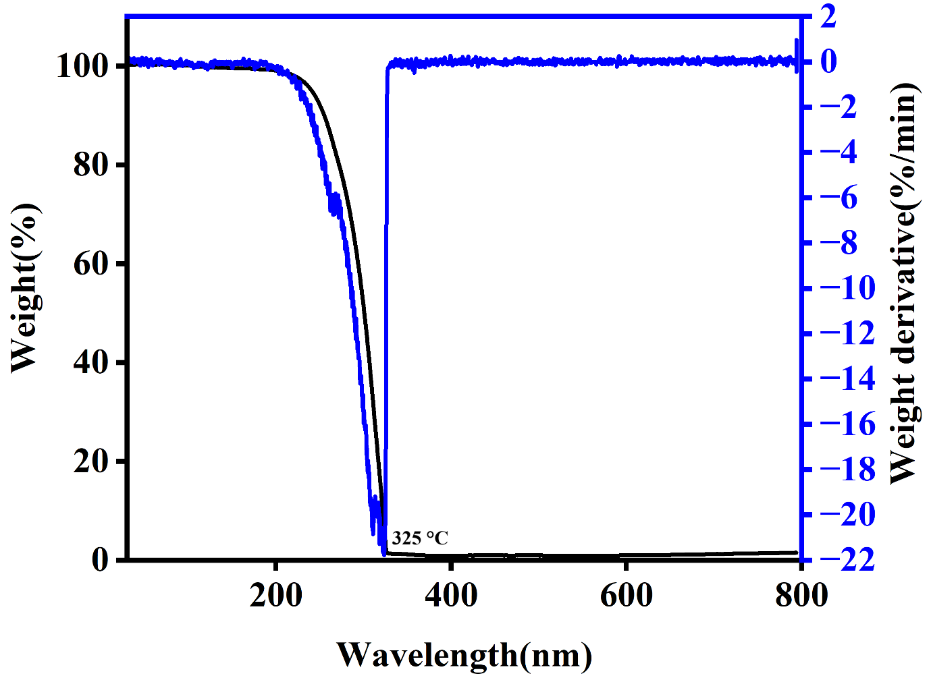


Figure 7S: Thermogram of the concomitant Polymorph-2 and Polymorph-3 (Heating rate 10 °C/minute under nitrogen).


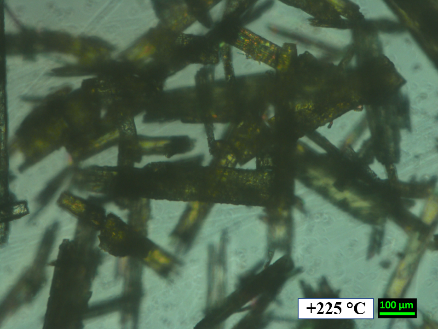

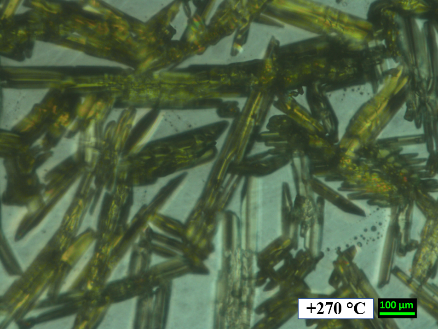

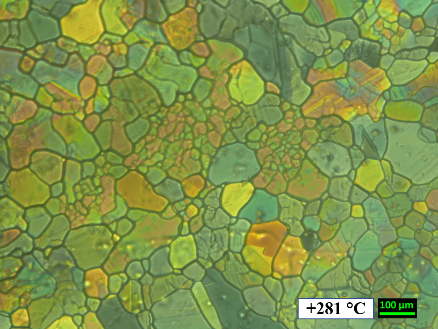


Figure 8S:  POM image obtained for the Heating at 225 °C, 270 °C and 281 °C of the concomitant polymorph.


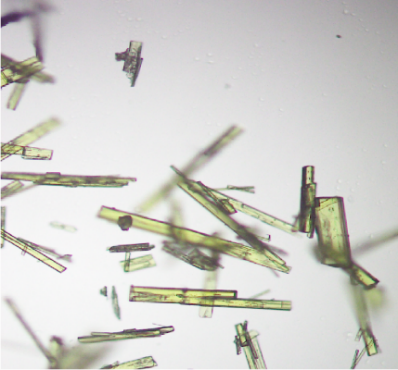

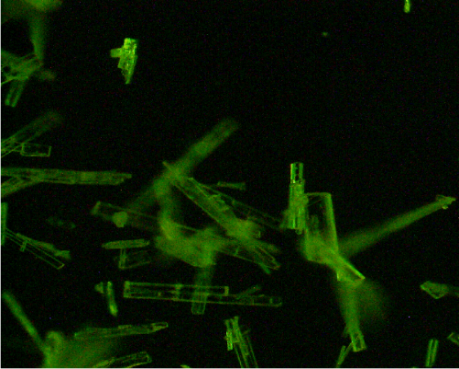


(a) (b)


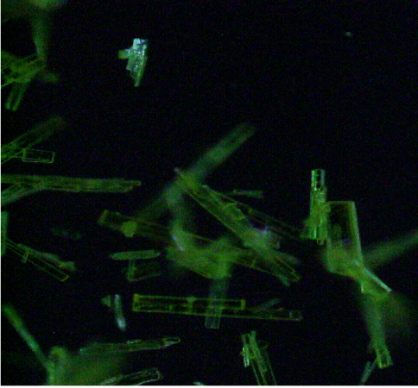

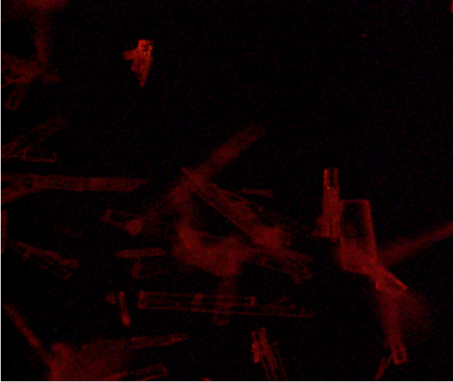


(c) (d)

Figure 9S:  Fluorescence microscopic images of the concomitant polymorphs (10 μM); a, b, c, and d are under visible-light, green light, UV light, and red light, respectively. (at room temperature)

Table S2 : Percentages (%) of interactions of all within the surface (Allin) with different atoms

| Polymorph | Allin-O | Allin-N | Allin-C | Allin-H |
| --- | --- | --- | --- | --- |
| Polymorph-1 | 13.4 | 3.2 | 22.6 | 60.7 |
| Polymorph-2 | 12.3 | 4.0 | 23.5 | 60.2 |
| Polymorph-3 | 11.7 | 4.0 | 24.6 | 59.7 |
